# Supplementary material
Source: publisher figshare collection journal article supplement (https://gsajournals.figshare.com/ndownloader/files/35058973)
Supplement: Supplementary file 1 [file 35058973]

1	seq-rs318443659	0	224488
1	seq-rs318763411	0	293696
1	seq-rs695735008	0	333333
1	seq-rs337665254	0	722623
1	seq-rs331218869	0	838596
1	seq-rs342685612	0	934682
1	seq-rs331140474	0	974053
1	seq-rs325469703	0	1037993
1	seq-rs319467767	0	1098352
1	seq-rs80960919	0	1166552
1	seq-rs326821277	0	1334349
1	seq-rs336442335	0	1384981
1	seq-rs691792856	0	1549683
1	seq-rs342751693	0	1592152
1	seq-rs81355602	0	1614750
1	seq-rs81355559	0	1637442
1	seq-rs694419783	0	1770015
1	seq-rs343532323	0	1901239
1	seq-rs81350909	0	1958514
1	seq-rs81223589	0	2073619
1	seq-rs341796752	0	2125452
1	seq-rs334103275	0.08266354	2176651
1	seq-rs344786328	0.2663195	2242672
1	seq-rs692039870	0.2726705	2244955
1	seq-rs335621014	0.4884033	2322507
1	seq-rs320263650	0.5445063	2342675
1	seq-rs81285456	1.112461	2546844
1	seq-rs319806031	1.447265	2667200
1	seq-rs81345355	1.502687	2687123
1	seq-rs346352794	2.18239	2931464
1	seq-rs81284115	2.396691	3008501
1	seq-rs81350349	2.56108	3067596
1	seq-rs81350606	2.68959	3113793
1	seq-rs335702362	3.372276	3359206
1	seq-rs81349304	3.649039	3458697
1	seq-rs81349911	4.206592	3659127
1	seq-rs81327137	4.575779	3791843
1	seq-rs80863164	4.814176	3877542
1	seq-rs81001320	5.316377	4058074
1	seq-rs80983568	5.399426	4087929
1	seq-rs80858340	5.573767	4150601
1	seq-rs319248026	5.648269	4177383
1	seq-rs80971497	5.890551	4264479
1	seq-rs80794128	7.158878	4828152
1	seq-rs328057893	7.68707	5008585
1	seq-rs327370543	7.959156	5101531
1	seq-rs333964317	8.180372	5191257
1	seq-rs326075398	8.248823	5222691
1	seq-rs327073002	8.477221	5327576
1	seq-rs80848743	8.624331	5395131
1	seq-rs337576369	8.78803	5470305
1	seq-rs80999170	9.143069	5633346
1	seq-rs334503918	9.68856	5883846
1	seq-rs321836710	9.709372	5893403
1	seq-rs80929997	9.964069	6010365
1	seq-rs81353908	10.56352	6153766
1	seq-rs81353920	10.7379	6183138
1	seq-rs335734740	10.86514	6204569
1	seq-rs81353969	11.10824	6245514
1	seq-rs80817901	11.38148	6297109
1	seq-rs80891444	11.53959	6400435
1	seq-rs80830268	11.64091	6466655
1	seq-rs328746520	11.67024	6485823
1	seq-rs80978442	11.79375	6566536
1	seq-rs80895861	12	6705592
1	seq-rs80892172	12	6750778
1	seq-rs331119436	12	6782868
1	seq-rs80918361	12	6793265
1	seq-rs81285937	12.00013	6850651
1	seq-rs339272999	12.01184	6875093
1	seq-rs318724096	12.03293	6919079
1	seq-rs81336441	12.06531	6986608
1	seq-rs81345570	12.09093	7040060
1	seq-rs339349129	12.10369	7066680
1	seq-rs343361481	12.13061	7122813
1	seq-rs80870206	12.84777	7268471
1	seq-rs339486726	13.04657	7423990
1	seq-rs80822192	13.26328	7511838
1	seq-rs80936935	13.42661	7562715
1	seq-rs327481444	13.57575	7619117
1	seq-rs341994398	13.5954	7659256
1	seq-rs341569161	13.6038	7676398
1	seq-rs345263678	13.64737	7765351
1	seq-rs81354449	13.65544	7781841
1	seq-rs333973752	13.73549	7945278
1	seq-rs80918885	13.76468	8004890
1	seq-rs334294280	13.7749	8025743
1	seq-rs328241241	13.80488	8086957
1	seq-rs322440475	13.80656	8090398
1	seq-rs334120701	13.85336	8143172
1	seq-rs80987387	13.87995	8163361
1	seq-rs80945485	13.88502	8167215
1	seq-rs80879895	13.9713	8232739
1	seq-rs325805922	14.11629	8342840
1	seq-rs339602497	14.17501	8387436
1	seq-rs81354726	14.40873	8564922
1	seq-rs81354717	14.45544	8600391
1	seq-rs81354735	14.60447	8713566
1	seq-rs81354739	14.60662	8715201
1	seq-rs81474236	14.7298	8808745
1	seq-rs81336482	14.7912	8855372
1	seq-rs80972494	14.89988	8937900
1	seq-rs80977017	14.99129	9007321
1	seq-rs708019651	15.0336	9039449
1	seq-rs333483410	15.13826	9118932
1	seq-rs80895002	15.18087	9151288
1	seq-rs324398247	15.23126	9189551
1	seq-rs323390426	15.3328	9266662
1	seq-rs81223010	15.36493	9291066
1	seq-rs81258794	15.40907	9324586
1	seq-rs81354758	15.42726	9338399
1	seq-rs342854153	15.49321	9388479
1	seq-rs346340213	16.00616	9487587
1	seq-rs81000936	16.19584	9518318
1	seq-rs80962249	16.51405	9569872
1	seq-rs80985205	16.62157	9651655
1	seq-rs81354926	16.62596	9676758
1	seq-rs80814693	16.64576	9790092
1	seq-rs80927488	16.65176	9824440
1	seq-rs80989419	16.66024	9872984
1	seq-rs80964050	16.66941	9925434
1	seq-rs80932898	16.67398	9951603
1	seq-rs80921216	16.71224	10170564
1	seq-rs80867674	16.71814	10204349
1	seq-rs80852727	16.72988	10271509
1	seq-rs80979304	16.73813	10318726
1	seq-rs80823923	16.7558	10419906
1	seq-rs328196836	16.77337	10520459
1	seq-rs81293580	16.77712	10541915
1	seq-rs81304826	16.77841	10549302
1	seq-rs343730441	16.85661	10634407
1	seq-rs81355084	17.06554	10693322
1	seq-rs81355186	17.31199	10762818
1	seq-rs81355245	17.81071	10903449
1	seq-rs81355262	17.90899	10931163
1	seq-rs330132041	18.02586	10964120
1	seq-rs81328190	18.20754	11015351
1	seq-rs695154793	18.36233	11058999
1	seq-rs81318034	18.98339	11234129
1	seq-rs81324899	19.17879	11289228
1	seq-rs81273190	19.27016	11314995
1	seq-rs324862809	19.71381	11440098
1	seq-rs81304393	19.81591	11468888
1	seq-rs323805706	19.96957	11519617
1	seq-rs327390474	20.11753	11573566
1	seq-rs80944993	20.55851	11734351
1	seq-rs80993574	20.87901	11851208
1	seq-rs80860776	21.02659	11905018
1	seq-rs80851575	21.11504	11945736
1	seq-rs319014249	21.21519	12001081
1	seq-rs334734517	21.2159	12001476
1	seq-rs81355460	21.30054	12063437
1	seq-rs345417467	21.30183	12099871
1	seq-rs320033992	21.30264	12123129
1	seq-rs338832768	21.30497	12189235
1	seq-rs345170795	21.30717	12251906
1	seq-rs325169347	21.30825	12282603
1	seq-rs80942011	21.31067	12332690
1	seq-rs330948594	21.39441	12394722
1	seq-rs319668451	21.48273	12460149
1	seq-rs343248181	21.69498	12617376
1	seq-rs80838895	21.80502	12698888
1	seq-rs80890280	21.87868	12753460
1	seq-rs80800119	21.95934	12813204
1	seq-rs80909239	22.06583	12892089
1	seq-rs81355568	22.21926	13005744
1	seq-rs338481263	22.26959	13043033
1	seq-rs325054119	22.34695	13100336
1	seq-rs80870251	22.42391	13157349
1	seq-rs80937474	22.50012	13213803
1	seq-rs80863128	22.55333	13253219
1	seq-rs331489442	22.64861	13323800
1	seq-rs81348113	22.70222	13363514
1	seq-rs80921630	22.85704	13478197
1	seq-rs331308051	22.97109	13562680
1	seq-rs80848905	23.07129	13636910
1	seq-rs80949905	23.12666	13677926
1	seq-rs329948967	23.26214	13778283
1	seq-rs336131820	23.51703	13850714
1	seq-rs81256185	24.1165	14038761
1	seq-rs318764366	24.19688	14082434
1	seq-rs81228393	24.28786	14131868
1	seq-rs81348238	24.55869	14279020
1	seq-rs334225314	24.64269	14324663
1	seq-rs81348282	24.7419	14378568
1	seq-rs81348285	24.77807	14398220
1	seq-rs338323838	24.99378	14503963
1	seq-rs346290047	25.23367	14604975
1	seq-rs338879123	25.44264	14692968
1	seq-rs80919574	25.54377	14735550
1	seq-rs337921068	25.8384	14859615
1	seq-rs344377323	25.9172	14892793
1	seq-rs325275512	25.99734	14926540
1	seq-rs332775858	26.09951	14969563
1	seq-rs80970485	26.31063	15045014
1	seq-rs337074512	26.54484	15099052
1	seq-rs325201010	26.68371	15131094
1	seq-rs331118247	26.84284	15169718
1	seq-rs343945857	27.21092	15276032
1	seq-rs338546218	27.29742	15322101
1	seq-rs324850516	27.29744	15322111
1	seq-rs80853838	27.37347	15364776
1	seq-rs322696374	27.51047	15441648
1	seq-rs80924441	27.71617	15557077
1	seq-rs337097462	27.74972	15575902
1	seq-rs332490862	27.82964	15620751
1	seq-rs328041647	27.90778	15664596
1	seq-rs81348500	27.99897	15715768
1	seq-rs81348540	28.23198	15846521
1	seq-rs81348541	28.29292	15880718
1	seq-rs80836463	28.57454	16038746
1	seq-rs80989619	28.7461	16135015
1	seq-rs344706327	28.89951	16221099
1	seq-rs341065758	28.92632	16236146
1	seq-rs333373109	29.06352	16313130
1	seq-rs345749137	29.12734	16348945
1	seq-rs81348598	29.18991	16384057
1	seq-rs81296558	29.29284	16441812
1	seq-rs337646923	29.43742	16522941
1	seq-rs343385297	29.49824	16557073
1	seq-rs322401128	29.49841	16557168
1	seq-rs329350550	29.5839	16605139
1	seq-rs342172068	29.60931	16619398
1	seq-rs320023573	29.66976	16653320
1	seq-rs333755752	29.7548	16701036
1	seq-rs336613495	29.77007	16709604
1	seq-rs338424398	30.00152	16839483
1	seq-rs712358801	30.0017	16839586
1	seq-rs344839824	30.08633	16887075
1	seq-rs341956849	30.08789	16887948
1	seq-rs328764351	30.12288	16907585
1	seq-rs345106951	30.25431	16981336
1	seq-rs81348702	30.35468	17037654
1	seq-rs81348706	30.4065	17066735
1	seq-rs345278935	30.70354	17233414
1	seq-rs80787893	30.7863	17279854
1	seq-rs80904674	30.87367	17328884
1	seq-rs80827144	30.92447	17357389
1	seq-rs80806338	31.27269	17552791
1	seq-rs80881358	31.3549	17598924
1	seq-rs80963451	31.39713	17622619
1	seq-rs80807545	31.42449	17637973
1	seq-rs336422596	31.45808	17656821
1	seq-rs81349010	31.68882	17786299
1	seq-rs80936885	31.9304	17921859
1	seq-rs80886751	31.97082	17944541
1	seq-rs339319555	32.14226	18040739
1	seq-rs331772687	32.36411	18146139
1	seq-rs81349158	32.6612	18280269
1	seq-rs81349174	32.81405	18349279
1	seq-rs338758526	32.87466	18376642
1	seq-rs341197504	32.9934	18430253
1	seq-rs80833926	33.21058	18482030
1	seq-rs325526241	33.40688	18527521
1	seq-rs80924881	33.69879	18595164
1	seq-rs80965062	33.82946	18625445
1	seq-rs80967151	33.91256	18644699
1	seq-rs81216934	34.36552	18749667
1	seq-rs324872267	34.51484	18784267
1	seq-rs319515946	35.05346	18909085
1	seq-rs80866637	35.42492	18995163
1	seq-rs80895446	35.72234	19042425
1	seq-rs81349456	37.31464	19312605
1	seq-rs344806445	37.33154	19365295
1	seq-rs81349468	37.36219	19460835
1	seq-rs336187279	37.37267	19493503
1	seq-rs81317775	37.40203	19585039
1	seq-rs344854651	37.42645	19661155
1	seq-rs330589263	37.46999	19796918
1	seq-rs80829096	37.48	19840875
1	seq-rs80945249	37.48	19867415
1	seq-rs326820726	37.48	19925632
1	seq-rs341452268	37.55165	19988193
1	seq-rs81349620	37.63836	20025953
1	seq-rs342504308	37.68529	20046389
1	seq-rs327222917	37.97599	20172977
1	seq-rs331446595	38.03455	20198475
1	seq-rs330245796	38.03472	20198548
1	seq-rs320462610	38.25777	20295677
1	seq-rs324054928	38.37664	20347442
1	seq-rs328918267	38.51687	20408505
1	seq-rs81229318	38.64391	20463826
1	seq-rs81349666	38.69201	20484769
1	seq-rs324308331	38.82365	20542097
1	seq-rs329467959	38.90448	20577293
1	seq-rs320896796	39.07653	20672965
1	seq-rs80855395	39.12631	20722913
1	seq-rs80864472	39.34447	20941827
1	seq-rs80863051	39.37781	20975276
1	seq-rs80800455	39.42028	21017894
1	seq-rs318952144	39.54108	21139113
1	seq-rs329666944	39.59047	21188670
1	seq-rs80951125	39.68201	21280526
1	seq-rs80784224	39.72081	21319456
1	seq-rs326561103	39.76316	21361949
1	seq-rs81349743	39.84193	21440989
1	seq-rs334190024	39.91225	21511557
1	seq-rs80866387	39.97675	21576278
1	seq-rs80806865	39.99389	21593469
1	seq-rs339634276	40.05222	21647656
1	seq-rs80857393	40.11742	21707644
1	seq-rs342763566	40.14571	21733680
1	seq-rs80873215	40.27783	21811722
1	seq-rs327712878	40.39967	21855691
1	seq-rs322742647	40.52379	21900483
1	seq-rs343815929	40.61976	21935115
1	seq-rs325771981	40.65654	21973411
1	seq-rs80784552	40.70134	22057360
1	seq-rs80963342	40.78273	22203625
1	seq-rs332770778	40.78399	22205804
1	seq-rs325794399	40.85027	22320350
1	seq-rs81287779	40.89176	22392034
1	seq-rs81313901	40.9579	22506325
1	seq-rs323004746	41.02436	22621171
1	seq-rs81293508	41.05137	22667834
1	seq-rs81474265	41.11321	22774695
1	seq-rs337578303	41.17761	22874707
1	seq-rs81311913	41.46804	22946567
1	seq-rs81474238	41.65594	22993058
1	seq-rs81474127	41.85209	23041590
1	seq-rs326195967	41.98885	23075428
1	seq-rs324238196	42.31841	23156969
1	seq-rs81234399	42.37012	23169763
1	seq-rs331103906	42.77	23339879
1	seq-rs80957717	42.77	23375809
1	seq-rs80791435	42.77122	23441114
1	seq-rs321650477	42.78325	23481463
1	seq-rs337015877	42.78327	23481550
1	seq-rs338380239	42.80862	23566682
1	seq-rs319774668	42.83004	23638601
1	seq-rs327656939	42.85006	23705824
1	seq-rs339397190	42.86686	23762214
1	seq-rs333229487	42.8803	23807348
1	seq-rs81350109	42.89	23858687
1	seq-rs331150064	42.94769	23909948
1	seq-rs81350134	43.00008	23952116
1	seq-rs321159216	43.0001	23952138
1	seq-rs340461505	43.08329	24019094
1	seq-rs80995123	43.19078	24105625
1	seq-rs80895641	43.23007	24137245
1	seq-rs80873570	43.28284	24179720
1	seq-rs80996194	43.31016	24201711
1	seq-rs80794744	43.35628	24238837
1	seq-rs80871897	43.45542	24318637
1	seq-rs80842841	43.48719	24344203
1	seq-rs344304414	43.57847	24417680
1	seq-rs81350220	43.62467	24454868
1	seq-rs81350247	43.68746	24505411
1	seq-rs328729464	43.72766	24537768
1	seq-rs80998601	43.82521	24616291
1	seq-rs80848875	43.83953	24627818
1	seq-rs343370664	43.84708	24633897
1	seq-rs703013970	43.97485	24736743
1	seq-rs333485024	44.03708	24786834
1	seq-rs335598848	44.10534	24841771
1	seq-rs80963376	44.13578	24866282
1	seq-rs81350435	44.2018	24919418
1	seq-rs81350487	44.38061	25063347
1	seq-rs324970387	44.47937	25142839
1	seq-rs320097435	44.48288	25145668
1	seq-rs323670468	44.51622	25216137
1	seq-rs80869688	44.5456	25288664
1	seq-rs80886405	44.57604	25363805
1	seq-rs332737717	44.65054	25547736
1	seq-rs80991420	44.66366	25580117
1	seq-rs322461911	44.66861	25592346
1	seq-rs81237189	44.70093	25672125
1	seq-rs336325244	44.74375	25777831
1	seq-rs328212483	44.74385	25778090
1	seq-rs81350544	44.75328	25801355
1	seq-rs80782607	44.77612	25857749
1	seq-rs322635289	44.82156	25969939
1	seq-rs328656127	44.82745	25984481
1	seq-rs80822138	44.87094	26091832
1	seq-rs80860170	44.89515	26144290
1	seq-rs346014630	45.18367	26447452
1	seq-rs326388531	45.23068	26496839
1	seq-rs80927921	45.24023	26506878
1	seq-rs80877888	45.35887	26631533
1	seq-rs319973945	45.38509	26659085
1	seq-rs707229074	45.38585	26659885
1	seq-rs344277517	45.45809	26735780
1	seq-rs80871686	45.46775	26745940
1	seq-rs80941031	45.47839	26757112
1	seq-rs330576145	45.53883	26820623
1	seq-rs80837368	45.57324	26856773
1	seq-rs339668320	45.63845	26925288
1	seq-rs344714510	45.67151	26960026
1	seq-rs346255683	45.70268	26985822
1	seq-rs80813902	45.80958	27039486
1	seq-rs320315267	46.15092	27210848
1	seq-rs80824752	46.32448	27306383
1	seq-rs327666757	46.36749	27408592
1	seq-rs81350882	46.41632	27524645
1	seq-rs81350908	46.45316	27612186
1	seq-rs329104488	46.47873	27672943
1	seq-rs331445472	46.50163	27727382
1	seq-rs692025096	46.52443	27781572
1	seq-rs81221956	46.55297	27849401
1	seq-rs80995772	46.56396	27875517
1	seq-rs319255560	46.57403	27899431
1	seq-rs337698124	46.59	28000562
1	seq-rs80805033	46.59	28050709
1	seq-rs344742293	46.59	28230759
1	seq-rs325794879	46.59	28271459
1	seq-rs80967463	46.59	28301273
1	seq-rs325171753	46.59	28453399
1	seq-rs341527901	46.59	28473931
1	seq-rs80878591	46.59	28574065
1	seq-rs80888368	46.59	28612780
1	seq-rs80874571	46.59	28713939
1	seq-rs328543935	46.59	28753934
1	seq-rs344986706	46.64821	28838554
1	seq-rs81351210	46.67649	28860368
1	seq-rs81351205	46.72701	28899322
1	seq-rs80833717	46.89256	29026999
1	seq-rs80973014	46.9199	29048088
1	seq-rs80899606	47.00669	29115029
1	seq-rs80831124	47.04753	29146525
1	seq-rs80949671	47.123	29204729
1	seq-rs333299610	47.19807	29262628
1	seq-rs81351525	47.37971	29402711
1	seq-rs332264603	47.50839	29501954
1	seq-rs81351563	47.55652	29539072
1	seq-rs81351590	47.68082	29634941
1	seq-rs337395185	47.73177	29674226
1	seq-rs81351647	47.80257	29728836
1	seq-rs81243132	47.85765	29771314
1	seq-rs81351630	47.94833	29841251
1	seq-rs81351664	48.08842	29949287
1	seq-rs345649420	48.15936	30004002
1	seq-rs318250367	48.1992	30034731
1	seq-rs339482483	48.28317	30099491
1	seq-rs80804862	48.39223	30173606
1	seq-rs345395080	48.45684	30203405
1	seq-rs80821991	48.56859	30254935
1	seq-rs80877297	48.68961	30310743
1	seq-rs81351813	48.87942	30451858
1	seq-rs81351747	48.94019	30491512
1	seq-rs81351795	49.01577	30540826
1	seq-rs322173385	49.05182	30564344
1	seq-rs343724215	49.18654	30652248
1	seq-rs80916612	49.23363	30682978
1	seq-rs80901735	49.30198	30734120
1	seq-rs319833718	49.30408	30736630
1	seq-rs333975136	49.38171	30829685
1	seq-rs318346206	49.42241	30876135
1	seq-rs709844472	49.45093	30882726
1	seq-rs712024866	49.45234	30883050
1	seq-rs81474117	49.61367	30920321
1	seq-rs81331249	49.70664	30941797
1	seq-rs337837917	49.79606	30962452
1	seq-rs81313678	49.86457	30978281
1	seq-rs81335205	49.9955	31008523
1	seq-rs81352060	50.09688	31031943
1	seq-rs319887260	50.1147	31036059
1	seq-rs81352085	50.8354	31202546
1	seq-rs81352067	50.9122	31220287
1	seq-rs80806625	51.14818	31274799
1	seq-rs321978171	51.29639	31309038
1	seq-rs81352216	51.61634	31382948
1	seq-rs80978554	51.74	31422428
1	seq-rs80843428	51.74	31466142
1	seq-rs80882812	51.74458	31522170
1	seq-rs337099881	51.7481	31551522
1	seq-rs327545087	51.75863	31639243
1	seq-rs80850323	51.76412	31685020
1	seq-rs80919619	51.7691	31726550
1	seq-rs80930931	51.78022	31819216
1	seq-rs80840436	51.78373	31848478
1	seq-rs342720351	51.79318	31927275
1	seq-rs708578271	51.80439	32020703
1	seq-rs334924951	51.81404	32070426
1	seq-rs330376712	51.81509	32071194
1	seq-rs80828878	51.9459	32166894
1	seq-rs80918302	51.98046	32192171
1	seq-rs80882223	52.13625	32310471
1	seq-rs80879384	52.15531	32337588
1	seq-rs80841011	52.20151	32403316
1	seq-rs80971347	52.2273	32440003
1	seq-rs80787670	52.29327	32533869
1	seq-rs80843362	52.36462	32635380
1	seq-rs80868675	52.39819	32683141
1	seq-rs80988056	52.46525	32778544
1	seq-rs319153727	52.49769	32824706
1	seq-rs341626452	52.56401	32919067
1	seq-rs80882047	52.60806	32981735
1	seq-rs80830519	52.62666	33008187
1	seq-rs80872645	52.66221	33058777
1	seq-rs80963483	52.68816	33095690
1	seq-rs334595478	52.76476	33204676
1	seq-rs334241064	52.7771	33222232
1	seq-rs326491486	52.89093	33384181
1	seq-rs80795630	52.98003	33510956
1	seq-rs80945738	53.00768	33550287
1	seq-rs80819454	53.02929	33581035
1	seq-rs80827307	53.09466	33674040
1	seq-rs339794235	53.12714	33720247
1	seq-rs80938016	53.27364	33928684
1	seq-rs81353322	53.30497	33973260
1	seq-rs81353324	53.3248	34001467
1	seq-rs81237803	53.4716	34066815
1	seq-rs80819739	53.73285	34153606
1	seq-rs80805531	53.73299	34153658
1	seq-rs340160890	53.82085	34182843
1	seq-rs80902748	53.95073	34225991
1	seq-rs80835026	54.01979	34248937
1	seq-rs80996105	54.20783	34311407
1	seq-rs80869942	54.48281	34392026
1	seq-rs80964562	54.94519	34510880
1	seq-rs80897832	55.26356	34592715
1	seq-rs328640075	55.36681	34619254
1	seq-rs80801544	55.5461	34682914
1	seq-rs320310715	55.58211	34731430
1	seq-rs341119866	55.66157	34838524
1	seq-rs80975891	55.68885	34875287
1	seq-rs80863757	55.72721	34926988
1	seq-rs80898993	55.77659	34993536
1	seq-rs325745805	55.83006	35065607
1	seq-rs80837165	55.87	35166033
1	seq-rs325456750	56.06691	35279538
1	seq-rs81345550	56.07252	35281294
1	seq-rs713224653	56.07618	35282444
1	seq-rs346143796	56.08	35387799
1	seq-rs80787211	56.08947	35464737
1	seq-rs80984743	56.0895	35464835
1	seq-rs81353353	56.10088	35500839
1	seq-rs80927738	56.12932	35590847
1	seq-rs81276926	56.17474	35734593
1	seq-rs81353367	56.1868	35772766
1	seq-rs81353386	56.20892	35842771
1	seq-rs323974258	56.23819	35935416
1	seq-rs81229435	56.25451	35987086
1	seq-rs81353403	56.27292	36045354
1	seq-rs335471167	56.29001	36099432
1	seq-rs323758185	56.3096	36161457
1	seq-rs80881049	56.36948	36220958
1	seq-rs80933024	56.41618	36246070
1	seq-rs320456650	56.63549	36364011
1	seq-rs339374448	56.73705	36418629
1	seq-rs80793532	56.78566	36444769
1	seq-rs318411550	56.90176	36507202
1	seq-rs339366020	57.00233	36561284
1	seq-rs81353459	57.24377	36691125
1	seq-rs81353461	57.28117	36711236
1	seq-rs80827537	57.51616	36837598
1	seq-rs80847507	57.61681	36891730
1	seq-rs80961871	57.68035	36925896
1	seq-rs80866344	57.88516	37036037
1	seq-rs340986896	57.90929	37049013
1	seq-rs335696641	57.95	37101707
1	seq-rs330895892	57.95	37151444
1	seq-rs344937101	57.95	37184942
1	seq-rs344632120	57.95	37322515
1	seq-rs80834529	58.24125	37548673
1	seq-rs337608802	58.54539	37622059
1	seq-rs80914507	58.86568	37730528
1	seq-rs80888700	58.97754	37774475
1	seq-rs338183846	59.14618	37840734
1	seq-rs319613308	59.14642	37840830
1	seq-rs337471656	59.46067	37964303
1	seq-rs327130334	59.66479	38044509
1	seq-rs792767463	59.7604	38082074
1	seq-rs81249167	60.10259	38216523
1	seq-rs81353502	60.24831	38300729
1	seq-rs81353505	60.30075	38334381
1	seq-rs81353517	60.46873	38442171
1	seq-rs80990751	60.5257	38478727
1	seq-rs80923004	60.67839	38574466
1	seq-rs80839336	60.77546	38635057
1	seq-rs332564512	60.91109	38719724
1	seq-rs330107499	61.01941	38787342
1	seq-rs331464416	61.15199	38870105
1	seq-rs80845453	61.25101	38931921
1	seq-rs342474459	61.41988	39037334
1	seq-rs333924289	61.45981	39062262
1	seq-rs321756182	61.49593	39084813
1	seq-rs81353532	61.54296	39114171
1	seq-rs336041977	61.64066	39175162
1	seq-rs318777216	61.84394	39302054
1	seq-rs81337667	62.05511	39433881
1	seq-rs81353536	62.11057	39468495
1	seq-rs81353540	62.15775	39497951
1	seq-rs331544219	62.2949	39583570
1	seq-rs345006748	62.30228	39588177
1	seq-rs343360486	62.37532	39633767
1	seq-rs341208736	62.44182	39675279
1	seq-rs329400700	62.44187	39675311
1	seq-rs339492684	62.61953	39786213
1	seq-rs80861395	62.68365	39826244
1	seq-rs80815400	62.75462	39870547
1	seq-rs327330154	62.85125	39930866
1	seq-rs327502718	62.92754	39978492
1	seq-rs80850491	62.99028	40017655
1	seq-rs80963195	63.03131	40043270
1	seq-rs324675608	63.12498	40101740
1	seq-rs336019158	63.12521	40101883
1	seq-rs341296254	63.21325	40156840
1	seq-rs80790006	63.91643	40506962
1	seq-rs80896505	64.19936	40621730
1	seq-rs80889170	64.31401	40668238
1	seq-rs80996823	64.57538	40774266
1	seq-rs80869407	64.81225	40870350
1	seq-rs80794916	64.9543	40927974
1	seq-rs321443087	65.09544	40985233
1	seq-rs323260565	65.21809	41034986
1	seq-rs80954784	65.32854	41091665
1	seq-rs80920301	65.37262	41137756
1	seq-rs80894849	65.40598	41172639
1	seq-rs322586890	65.45018	41218862
1	seq-rs697601714	65.56912	41343257
1	seq-rs81233555	65.63889	41416210
1	seq-rs81353602	65.69273	41472511
1	seq-rs81353572	65.76021	41543089
1	seq-rs81353611	65.8091	41621012
1	seq-rs696924404	65.83388	41663922
1	seq-rs320238419	65.84872	41689609
1	seq-rs331330866	65.87	41772564
1	seq-rs81322226	65.88778	41839164
1	seq-rs80908061	66.008	41985796
1	seq-rs80864669	66.04269	42028120
1	seq-rs80967847	66.05856	42047463
1	seq-rs326734615	66.09975	42097725
1	seq-rs344817105	66.10722	42106831
1	seq-rs81222069	66.20791	42229637
1	seq-rs331278230	66.3356	42385392
1	seq-rs325478333	66.41468	42481849
1	seq-rs338264465	66.44	42528991
1	seq-rs325033187	66.44	42656427
1	seq-rs699102902	66.44	42699259
1	seq-rs80969436	66.44	42744142
1	seq-rs335077729	66.44909	42788172
1	seq-rs319269427	66.51282	42865317
1	seq-rs80967457	66.58401	42951497
1	seq-rs80869667	66.59505	42964863
1	seq-rs81353628	66.64	43045248
1	seq-rs81353637	66.65919	43128805
1	seq-rs81353634	66.70813	43184769
1	seq-rs81313556	66.78001	43266972
1	seq-rs81333533	66.84055	43336210
1	seq-rs330595767	66.85892	43357211
1	seq-rs81335840	66.9481	43459192
1	seq-rs81353644	67.04954	43575197
1	seq-rs81353650	67.10513	43638781
1	seq-rs81353664	67.19497	43741515
1	seq-rs81353677	67.26275	43819028
1	seq-rs80903565	67.33833	43905451
1	seq-rs80913792	67.38132	43954624
1	seq-rs80972299	67.40916	43986463
1	seq-rs80826395	67.46361	44048727
1	seq-rs345517447	67.50967	44101406
1	seq-rs80809795	67.56759	44167640
1	seq-rs80938019	67.60499	44210408
1	seq-rs704742393	67.67941	44295520
1	seq-rs343892662	67.79652	44429438
1	seq-rs343231146	67.81396	44449381
1	seq-rs81322980	67.94064	44564440
1	seq-rs80861270	68.10162	44680594
1	seq-rs80973105	68.15679	44720402
1	seq-rs80860743	68.2005	44751939
1	seq-rs323211721	68.31223	44832547
1	seq-rs331706042	68.31306	44833151
1	seq-rs81261626	68.45959	44938878
1	seq-rs323752629	68.57571	45022665
1	seq-rs80852146	68.70545	45116274
1	seq-rs334586143	68.80171	45185728
1	seq-rs80971770	68.87731	45240273
1	seq-rs339967514	68.89973	45256449
1	seq-rs327111640	68.9	45270375
1	seq-rs81332935	68.9	45404064
1	seq-rs81353702	68.9	45471872
1	seq-rs81353707	68.9	45536477
1	seq-rs334692977	68.9	45577720
1	seq-rs80792861	68.9	45615037
1	seq-rs319956044	68.9	45620989
1	seq-rs344742107	68.9	45679136
1	seq-rs80868768	68.9	45679931
1	seq-rs334522124	68.9	45711480
1	seq-rs80809397	68.9	45771450
1	seq-rs80829327	68.9	45831843
1	seq-rs80801917	68.9	45857748
1	seq-rs80929867	68.9	45930296
1	seq-rs325392215	68.9	45972929
1	seq-rs80825219	68.9	46059713
1	seq-rs80885362	68.9	46139189
1	seq-rs81347036	68.9	46272825
1	seq-rs339227800	68.9	46321425
1	seq-rs340212855	68.9	46340141
1	seq-rs323173282	68.9	46378547
1	seq-rs340543781	68.9	46451307
1	seq-rs339641133	68.9	46620142
1	seq-rs321623103	68.9	46671344
1	seq-rs81329420	68.9	46745381
1	seq-rs335097416	68.9	46849342
1	seq-rs327453327	68.9	46866398
1	seq-rs326440115	68.94833	46965917
1	seq-rs324546123	69.12916	47087424
1	seq-rs81325156	69.24599	47165930
1	seq-rs691352977	69.2907	47195979
1	seq-rs337910845	69.477	47321161
1	seq-rs81353721	69.53503	47360160
1	seq-rs325789442	69.63207	47425367
1	seq-rs325858800	69.98925	47665374
1	seq-rs80947483	70.02731	47690951
1	seq-rs334994330	70.06577	47716798
1	seq-rs81314524	70.24162	47834957
1	seq-rs81323389	70.39466	47931736
1	seq-rs80857915	70.60472	48013733
1	seq-rs80799638	70.79568	48088271
1	seq-rs328722704	70.94194	48145359
1	seq-rs81353735	71.00266	48169059
1	seq-rs329594513	71.14573	48224902
1	seq-rs80930631	71.14616	48225073
1	seq-rs337198929	71.43275	48495989
1	seq-rs80849459	71.4546	48528854
1	seq-rs80885180	71.46163	48539442
1	seq-rs80922211	71.47966	48566564
1	seq-rs80836620	71.50724	48608056
1	seq-rs81353739	71.55541	48680531
1	seq-rs81227569	71.61543	48782415
1	seq-rs698947215	71.63126	48839954
1	seq-rs343209825	71.67092	48984092
1	seq-rs81353773	71.68253	49026306
1	seq-rs330650331	71.69118	49057741
1	seq-rs80871384	71.70762	49117476
1	seq-rs80836362	71.71381	49140000
1	seq-rs80988853	71.72829	49192624
1	seq-rs333469947	71.75015	49272081
1	seq-rs80934721	71.75734	49298217
1	seq-rs80967590	71.77663	49368325
1	seq-rs344074986	71.79613	49439200
1	seq-rs81353780	71.84045	49600328
1	seq-rs332812178	71.86069	49673893
1	seq-rs80966437	71.8861	49766240
1	seq-rs80857748	71.90108	49820676
1	seq-rs80926786	71.91294	49863808
1	seq-rs329236456	71.93505	49944172
1	seq-rs81353795	71.94298	49972965
1	seq-rs81353805	71.95467	50015447
1	seq-rs81353806	71.96488	50052578
1	seq-rs80961260	72.02032	50254096
1	seq-rs81353817	72.03838	50319734
1	seq-rs81353819	72.05	50453600
1	seq-rs81353825	72.05	50529066
1	seq-rs334582366	72.05	50570930
1	seq-rs81341402	72.05	50686333
1	seq-rs335771483	72.05211	50753297
1	seq-rs340994956	72.05225	50753481
1	seq-rs80819394	72.19041	50938357
1	seq-rs80803439	72.23634	50999817
1	seq-rs320845689	72.26945	51044111
1	seq-rs322517519	72.30753	51095064
1	seq-rs340587056	72.38039	51192557
1	seq-rs325258696	72.41553	51239585
1	seq-rs334957961	72.42	51333320
1	seq-rs80941742	72.42	51350022
1	seq-rs80791016	72.42	51457476
1	seq-rs81268908	72.42	51531316
1	seq-rs80917345	72.42	51671808
1	seq-rs81353843	72.42018	51718844
1	seq-rs80991444	72.42419	51733789
1	seq-rs319308064	72.4455	51813283
1	seq-rs81353848	72.48321	51953963
1	seq-rs325302053	72.52956	52126918
1	seq-rs341060159	72.53606	52151127
1	seq-rs343905638	72.53759	52156856
1	seq-rs80945278	72.55	52319685
1	seq-rs342045080	72.55	52393247
1	seq-rs80876677	72.55	52418922
1	seq-rs338053997	72.57948	52746316
1	seq-rs329159796	72.6952	52843788
1	seq-rs81353873	72.76359	52901401
1	seq-rs80882674	72.79809	52930466
1	seq-rs80968536	72.87946	52999008
1	seq-rs337977782	73.0135	53111915
1	seq-rs325046302	73.04211	53136016
1	seq-rs336857636	73.12704	53207569
1	seq-rs80938366	73.22629	53291168
1	seq-rs337850122	73.33851	53385703
1	seq-rs80981202	73.33853	53385720
1	seq-rs333313681	73.34949	53394950
1	seq-rs80981102	73.37974	53420432
1	seq-rs80843421	73.68488	53677479
1	seq-rs692408014	73.79594	53771030
1	seq-rs694123732	73.80614	53779631
1	seq-rs80782057	73.98969	53876081
1	seq-rs80854668	74.02541	53892297
1	seq-rs80935001	74.18493	53964692
1	seq-rs331424467	74.33674	54033593
1	seq-rs80833448	74.46959	54093883
1	seq-rs80983395	74.68378	54191098
1	seq-rs80952894	74.73927	54216280
1	seq-rs341744126	75.00004	54334627
1	seq-rs80818235	75.46588	54546769
1	seq-rs327331734	75.5521	54586030
1	seq-rs341637270	75.55299	54586434
1	seq-rs81353945	76.075	54824153
1	seq-rs319936638	76.21536	54888069
1	seq-rs80931790	76.3779	54962087
1	seq-rs80867311	76.48762	55012053
1	seq-rs80873405	76.55062	55040741
1	seq-rs80879167	76.60732	55066559
1	seq-rs80847203	76.63852	55080766
1	seq-rs337327221	76.84779	55176063
1	seq-rs81353970	76.9625	55228306
1	seq-rs329338839	77.15	55320019
1	seq-rs321650244	77.15	55400345
1	seq-rs81353991	77.26583	55550232
1	seq-rs338151754	77.40719	55652012
1	seq-rs338986205	77.47826	55703180
1	seq-rs320486909	77.47836	55703252
1	seq-rs340351646	77.55577	55758997
1	seq-rs81354005	77.69141	55856661
1	seq-rs81354011	77.73	55890468
1	seq-rs324287239	77.76229	56081288
1	seq-rs80972209	77.7854	56132224
1	seq-rs80799193	77.85106	56276960
1	seq-rs325709599	77.88676	56355656
1	seq-rs80834507	77.91882	56426322
1	seq-rs80828418	77.95066	56496507
1	seq-rs338094097	77.97926	56559543
1	seq-rs705708410	78.02999	56671370
1	seq-rs81211347	78.06048	56699380
1	seq-rs81218951	78.28387	56764306
1	seq-rs326928550	78.32923	56777489
1	seq-rs330798074	79.10884	57004072
1	seq-rs81354038	79.76025	57230147
1	seq-rs81292902	79.84418	57278231
1	seq-rs80999109	80.09457	57421664
1	seq-rs81354056	80.40599	57600062
1	seq-rs326314161	80.64857	57648581
1	seq-rs320824593	80.9	57732872
1	seq-rs81354125	80.9	57841633
1	seq-rs80967765	80.93095	57895638
1	seq-rs80955646	80.97929	57930380
1	seq-rs80938060	81.04974	57981015
1	seq-rs80859012	81.15511	58056739
1	seq-rs80857762	81.20641	58093613
1	seq-rs80932750	81.26886	58138492
1	seq-rs80955905	81.3896	58199157
1	seq-rs80913537	81.43892	58220232
1	seq-rs341524931	81.61075	58293659
1	seq-rs80793418	81.66418	58316492
1	seq-rs329202524	81.71726	58339176
1	seq-rs331920413	81.8219	58383890
1	seq-rs333664176	81.92717	58428871
1	seq-rs80888881	82.10341	58504185
1	seq-rs319439205	82.21807	58579470
1	seq-rs80963078	82.23685	58600456
1	seq-rs80843143	82.27702	58645365
1	seq-rs80924738	82.32048	58693947
1	seq-rs81354137	82.38	58761934
1	seq-rs322632396	82.60791	58915678
1	seq-rs345508253	82.6362	58927999
1	seq-rs338312504	83.07	59155316
1	seq-rs342208807	83.07	59200415
1	seq-rs80958449	83.07	59222408
1	seq-rs80825359	83.07	59244511
1	seq-rs80944326	83.08649	59292000
1	seq-rs80824917	83.1562	59316715
1	seq-rs81478932	83.37759	59395215
1	seq-rs344596581	83.38188	59396737
1	seq-rs337208372	83.42719	59412805
1	seq-rs81354159	83.54237	59453638
1	seq-rs81336790	83.8176	59551231
1	seq-rs319098443	83.93558	59593062
1	seq-rs81341649	84.18816	59682626
1	seq-rs81354187	84.26971	59711534
1	seq-rs80915443	84.51379	59877769
1	seq-rs323836961	85.02213	59993794
1	seq-rs329791728	85.02621	60061235
1	seq-rs80850208	85.02753	60082873
1	seq-rs80856765	85.02967	60118182
1	seq-rs332896794	85.02969	60118510
1	seq-rs80848294	85.03304	60173706
1	seq-rs80969392	85.03703	60239650
1	seq-rs323017277	85.03905	60272935
1	seq-rs80921572	85.0489	60435580
1	seq-rs80820827	85.05092	60455614
1	seq-rs81354203	85.08817	60529049
1	seq-rs81354226	85.11422	60580419
1	seq-rs81354205	85.14009	60631425
1	seq-rs80837569	85.21021	60769684
1	seq-rs330388060	85.29606	60938935
1	seq-rs321818093	85.29613	60939083
1	seq-rs336271972	85.31454	60975377
1	seq-rs80793088	85.32809	61002086
1	seq-rs81001085	85.3491	61043511
1	seq-rs340409128	85.408	61159644
1	seq-rs331564137	85.48782	61337518
1	seq-rs330095822	85.56905	61389989
1	seq-rs80955080	86.33923	61643916
1	seq-rs80978384	86.62309	61710276
1	seq-rs337039422	86.80801	61753509
1	seq-rs80959648	87.15019	61833499
1	seq-rs80831169	87.38264	61940130
1	seq-rs327543001	87.52963	61992481
1	seq-rs333906833	87.57477	62039094
1	seq-rs324734258	87.57625	62040623
1	seq-rs80957755	87.59356	62058511
1	seq-rs80933845	87.65993	62127068
1	seq-rs80962816	87.73191	62201413
1	seq-rs80989189	87.75943	62229845
1	seq-rs343479600	87.87125	62345344
1	seq-rs80836228	87.90421	62379386
1	seq-rs81354248	87.95462	62431461
1	seq-rs81354258	87.99722	62475462
1	seq-rs81354275	88.1881	62684559
1	seq-rs320726523	88.2287	62733598
1	seq-rs691023363	88.22891	62733860
1	seq-rs81354279	88.27715	62792127
1	seq-rs81354286	88.29638	62815369
1	seq-rs80870348	88.33181	62858168
1	seq-rs80837524	88.36209	62894757
1	seq-rs80967460	88.38176	62918522
1	seq-rs80849407	88.48293	63040749
1	seq-rs80801212	88.52134	63087147
1	seq-rs80957796	88.53912	63108630
1	seq-rs81354307	88.64497	63236510
1	seq-rs81354338	88.85098	63378123
1	seq-rs340448986	89.33672	63583134
1	seq-rs335882728	89.39521	63631355
1	seq-rs80843147	89.43916	63667593
1	seq-rs81259086	89.50065	63718272
1	seq-rs330402196	89.53539	63746916
1	seq-rs80850790	89.66273	63850852
1	seq-rs328047929	89.86195	64010313
1	seq-rs80882185	89.91722	64054552
1	seq-rs80925060	89.96694	64094344
1	seq-rs320766318	90.05313	64163333
1	seq-rs340852912	90.11616	64213775
1	seq-rs81252922	90.16371	64251838
1	seq-rs81314995	90.2631	64331391
1	seq-rs80920730	90.27253	64338940
1	seq-rs319351592	90.45377	64478756
1	seq-rs339397026	90.58383	64533292
1	seq-rs319442591	90.63046	64552842
1	seq-rs319883611	90.65963	64565070
1	seq-rs81354368	91.01025	64628578
1	seq-rs81354344	91.24371	64708834
1	seq-rs80845539	91.26562	64750711
1	seq-rs80843828	91.28574	64789194
1	seq-rs80916220	91.35178	64915492
1	seq-rs335786898	91.37471	64959341
1	seq-rs80987585	91.40022	65008123
1	seq-rs80903138	91.41174	65030161
1	seq-rs80989755	91.44109	65086290
1	seq-rs80816507	91.46682	65135487
1	seq-rs322703805	91.4901	65154201
1	seq-rs80957772	91.53674	65183502
1	seq-rs80920344	91.57052	65204732
1	seq-rs81296530	91.61258	65237799
1	seq-rs81354389	91.63862	65321144
1	seq-rs80935538	91.64775	65350396
1	seq-rs80853855	91.66853	65416910
1	seq-rs80947594	91.68343	65464585
1	seq-rs81338289	91.72881	65609894
1	seq-rs345365998	91.78114	65777429
1	seq-rs80990462	91.79668	65827162
1	seq-rs80831570	91.84303	65878511
1	seq-rs80963454	91.88972	65922688
1	seq-rs344122978	91.94764	65977501
1	seq-rs326777736	91.96526	65994168
1	seq-rs80782197	92.02179	66047664
1	seq-rs332656053	92.25761	66270809
1	seq-rs80894890	92.32695	66336428
1	seq-rs80797858	92.37408	66381032
1	seq-rs81354399	92.53288	66531284
1	seq-rs81354406	92.60197	66596666
1	seq-rs81354407	92.62308	66616644
1	seq-rs702629991	92.70754	66696566
1	seq-rs318778600	92.80894	66792524
1	seq-rs331731389	93.01286	66985483
1	seq-rs329801582	93.31642	67171045
1	seq-rs332081746	93.50854	67282174
1	seq-rs318673262	93.54756	67304743
1	seq-rs81354420	93.66091	67370311
1	seq-rs707360855	93.79486	67447788
1	seq-rs325063388	93.81599	67460008
1	seq-rs696232317	93.92484	67522978
1	seq-rs81354429	94.14175	67648440
1	seq-rs80998527	94.21527	67690969
1	seq-rs80812470	94.25968	67716657
1	seq-rs338815390	94.33627	67760955
1	seq-rs80798325	94.42014	67809463
1	seq-rs339518021	94.45827	67831517
1	seq-rs791858952	94.61568	67922575
1	seq-rs80969303	94.66549	67951385
1	seq-rs80954763	94.97841	68132380
1	seq-rs340255888	95.01225	68264452
1	seq-rs334796409	95.0588	68289436
1	seq-rs80805012	95.15746	68342399
1	seq-rs343766271	95.46346	68506668
1	seq-rs326188185	95.46441	68507185
1	seq-rs709020776	95.59465	68577106
1	seq-rs711689346	96.08968	68842853
1	seq-rs326763243	96.17915	68890884
1	seq-rs322921570	96.31813	68993279
1	seq-rs333026920	96.31987	68994757
1	seq-rs80906735	96.40064	69063593
1	seq-rs80824679	96.43959	69096777
1	seq-rs80954267	96.49059	69140236
1	seq-rs80892218	96.58746	69222784
1	seq-rs80950628	96.70838	69325822
1	seq-rs80945005	96.72833	69342827
1	seq-rs324452491	96.86052	69470919
1	seq-rs331475311	96.86877	69490057
1	seq-rs81341737	96.89559	69552297
1	seq-rs346325300	96.92245	69614628
1	seq-rs331835618	96.92262	69615035
1	seq-rs339002378	96.98466	69758983
1	seq-rs81354471	96.99445	69781723
1	seq-rs80906441	97.07565	69900465
1	seq-rs80842289	97.13891	69968051
1	seq-rs80839093	97.17076	70002082
1	seq-rs80884319	97.23154	70068760
1	seq-rs328606515	97.32321	70180635
1	seq-rs341621704	97.35473	70219087
1	seq-rs81474332	97.36814	70235456
1	seq-rs326153177	97.41357	70290890
1	seq-rs325909710	97.7045	70645904
1	seq-rs80996124	97.72	70701950
1	seq-rs326515595	97.72	70869816
1	seq-rs318243210	97.72733	70910020
1	seq-rs80868692	97.7813	70950692
1	seq-rs80890495	97.9343	71065994
1	seq-rs80910541	98.01321	71125466
1	seq-rs81354534	98.04761	71151381
1	seq-rs81294517	98.19727	71264177
1	seq-rs81309827	98.28173	71327825
1	seq-rs81286784	98.33046	71364540
1	seq-rs704935747	98.58513	71556475
1	seq-rs80791165	98.67297	71622669
1	seq-rs80816305	98.90164	71814075
1	seq-rs80936747	98.96011	71863166
1	seq-rs319749497	98.98109	71880784
1	seq-rs80870997	99.06438	71950726
1	seq-rs81209087	99.14113	72015173
1	seq-rs80977907	99.15683	72028362
1	seq-rs80930000	99.21067	72073565
1	seq-rs80870517	99.29063	72142585
1	seq-rs80878579	99.2977	72169748
1	seq-rs80976465	99.33165	72300056
1	seq-rs80997522	99.34874	72365650
1	seq-rs80918268	99.37039	72448760
1	seq-rs80791347	99.37475	72465470
1	seq-rs80791584	99.39012	72524494
1	seq-rs80846286	99.40269	72572726
1	seq-rs341309084	99.41958	72637563
1	seq-rs330520588	99.43379	72692124
1	seq-rs81354571	99.44135	72721133
1	seq-rs340504702	99.45623	72778236
1	seq-rs81354573	99.46574	72814752
1	seq-rs80798219	99.48431	72886051
1	seq-rs328607884	99.48953	72906056
1	seq-rs80995170	99.50953	72982828
1	seq-rs80996334	99.54023	73100657
1	seq-rs80799682	99.54935	73135707
1	seq-rs80929393	99.55859	73171136
1	seq-rs80864801	99.592	73299353
1	seq-rs80794355	99.60004	73330274
1	seq-rs330263746	99.62	73408844
1	seq-rs342962347	99.62	73503057
1	seq-rs335777708	99.62	73520362
1	seq-rs325239539	99.62	73601042
1	seq-rs328088836	99.62	73792536
1	seq-rs80787789	99.62	73965970
1	seq-rs80979692	99.62	74032950
1	seq-rs333477358	99.62	74096526
1	seq-rs341934411	99.62	74096746
1	seq-rs80891284	99.62	74203064
1	seq-rs80838693	99.63985	74264584
1	seq-rs80872224	99.66504	74309279
1	seq-rs80946739	99.69643	74364965
1	seq-rs80857181	99.72192	74410201
1	seq-rs80924453	99.73075	74425866
1	seq-rs80892026	99.7541	74467285
1	seq-rs80792488	99.80517	74557891
1	seq-rs80821723	99.82739	74597318
1	seq-rs692036774	99.87003	74672951
1	seq-rs693709798	99.90923	74742507
1	seq-rs80919554	99.95335	74820786
1	seq-rs81336785	99.96938	74849229
1	seq-rs80932534	100.0071	74916127
1	seq-rs80834610	100.0872	75058189
1	seq-rs80971041	100.139	75151870
1	seq-rs80827883	100.1473	75167426
1	seq-rs81354598	100.1753	75219602
1	seq-rs80902311	100.1983	75262461
1	seq-rs331430653	100.2425	75344947
1	seq-rs80950863	100.2492	75357496
1	seq-rs80821579	100.271	75398012
1	seq-rs81354603	100.3108	75472274
1	seq-rs323889435	100.3264	75501427
1	seq-rs331467622	100.368	75579063
1	seq-rs81354638	100.4072	75652208
1	seq-rs81354626	100.4484	75728908
1	seq-rs80937879	100.5913	75914553
1	seq-rs80982877	100.6713	75968721
1	seq-rs333508742	100.7621	76030269
1	seq-rs80797739	100.8012	76056763
1	seq-rs80788543	100.8867	76114707
1	seq-rs80963100	100.9495	76157233
1	seq-rs80829508	101.0354	76215472
1	seq-rs81354656	101.1563	76297353
1	seq-rs81354649	101.2195	76340224
1	seq-rs81354653	101.3319	76416357
1	seq-rs81354645	101.3641	76438140
1	seq-rs696655587	101.4825	76518412
1	seq-rs330767472	101.6283	76617174
1	seq-rs81354661	101.6379	76623707
1	seq-rs337588698	101.8805	76788075
1	seq-rs81354675	101.9524	76836802
1	seq-rs334212028	102.0219	76883881
1	seq-rs81228351	102.0889	76929255
1	seq-rs338947835	102.204	77007275
1	seq-rs81336779	102.2102	77011485
1	seq-rs333691214	102.3389	77098653
1	seq-rs80969255	102.3728	77121687
1	seq-rs80900194	102.533	77230227
1	seq-rs80897893	102.6734	77325351
1	seq-rs324386378	102.7567	77381804
1	seq-rs80918218	102.7873	77402476
1	seq-rs331278924	102.8688	77457737
1	seq-rs81354693	102.9335	77518365
1	seq-rs345443450	102.9643	77577184
1	seq-rs319323532	102.9847	77616272
1	seq-rs324015871	103.0525	77746123
1	seq-rs344553919	103.09	77818069
1	seq-rs80861110	103.0974	77832061
1	seq-rs80816548	103.1712	77973487
1	seq-rs321475196	103.23	78231701
1	seq-rs333683330	103.23	78489777
1	seq-rs344572421	103.23	78527155
1	seq-rs333122850	103.23	78555890
1	seq-rs80965801	103.23	78587646
1	seq-rs323513656	103.249	78637659
1	seq-rs341166406	103.2522	78642552
1	seq-rs81354730	103.3727	78830221
1	seq-rs328133042	103.4521	79012582
1	seq-rs81354733	103.4802	79048821
1	seq-rs81263900	103.513	79091158
1	seq-rs344088393	103.5381	79123534
1	seq-rs338182651	103.5907	79191400
1	seq-rs80947501	103.6332	79246340
1	seq-rs80828357	103.6701	79293913
1	seq-rs336829667	103.6865	79315108
1	seq-rs80944142	103.7825	79438956
1	seq-rs336084756	103.8185	79485328
1	seq-rs80932995	103.989	79553192
1	seq-rs321362782	104.2141	79640927
1	seq-rs81223370	104.3335	79839200
1	seq-rs340763441	104.352	79930033
1	seq-rs328752479	104.3566	79952913
1	seq-rs320065994	104.3929	80019746
1	seq-rs339200359	104.3995	80029774
1	seq-rs81262693	104.4177	80057576
1	seq-rs81264881	104.4572	80117735
1	seq-rs325528733	104.508	80195315
1	seq-rs81000806	104.5399	80243844
1	seq-rs324616043	104.5853	80313171
1	seq-rs320883592	104.6176	80362402
1	seq-rs327440568	104.6484	80409463
1	seq-rs80793373	104.6523	80415290
1	seq-rs333988873	104.6989	80486442
1	seq-rs329302091	104.733	80538463
1	seq-rs319863370	104.7741	80601202
1	seq-rs80849049	104.7959	80634441
1	seq-rs80852442	104.8177	80667615
1	seq-rs80855295	104.9251	80831426
1	seq-rs80819437	104.9597	80884292
1	seq-rs80871402	105.0115	80963263
1	seq-rs322553823	105.0597	81036767
1	seq-rs342647233	105.1386	81157056
1	seq-rs80921280	105.2183	81215864
1	seq-rs80970729	105.2875	81257859
1	seq-rs80878001	105.4552	81341268
1	seq-rs325382922	105.7934	81500644
1	seq-rs80994515	105.8316	81518643
1	seq-rs80792383	106.0675	81629776
1	seq-rs319958914	106.2294	81706074
1	seq-rs330524945	106.2515	81716516
1	seq-rs81354757	106.3825	81778224
1	seq-rs336863751	106.5038	81835391
1	seq-rs321730976	106.6364	81897891
1	seq-rs81474145	106.6458	81902314
1	seq-rs332104612	106.7482	81950552
1	seq-rs81340201	106.7569	81954637
1	seq-rs81285191	106.849	81998047
1	seq-rs10720888	106.8928	82059783
1	seq-rs325430988	106.9358	82121336
1	seq-rs81263525	106.9628	82159992
1	seq-rs81354800	107.0047	82217436
1	seq-rs81354768	107.0398	82249107
1	seq-rs81354760	107.1158	82317661
1	seq-rs81354787	107.1356	82335564
1	seq-rs323619518	107.16	82425960
1	seq-rs81354778	107.16	82432785
1	seq-rs335620215	107.16	82517269
1	seq-rs80984123	107.16	82563753
1	seq-rs318529268	107.16	82584949
1	seq-rs81354813	107.16	82659323
1	seq-rs81354809	107.16	82741745
1	seq-rs81354806	107.16	82765808
1	seq-rs81248007	107.3215	82853588
1	seq-rs81354824	107.4066	82927458
1	seq-rs81354818	107.4276	82964894
1	seq-rs81354815	107.466	83033506
1	seq-rs80904820	107.5415	83142255
1	seq-rs80888830	107.5596	83163136
1	seq-rs326359600	107.616	83228469
1	seq-rs81283676	107.6432	83260076
1	seq-rs80836191	107.92	83389881
1	seq-rs339790381	107.9253	83477121
1	seq-rs80926844	107.9319	83498280
1	seq-rs319299540	107.9569	83578218
1	seq-rs80817420	107.9675	83612114
1	seq-rs81354861	108.0116	83753095
1	seq-rs80873183	108.0378	83837072
1	seq-rs80843002	108.0589	83904334
1	seq-rs338813317	108.0616	83913165
1	seq-rs329838257	108.1036	84047451
1	seq-rs81002480	108.106	84055266
1	seq-rs80808435	108.1158	84086521
1	seq-rs335636778	108.1221	84106551
1	seq-rs80867816	108.1395	84162499
1	seq-rs80909035	108.146	84182986
1	seq-rs80796868	108.1586	84223593
1	seq-rs80791631	108.1772	84282882
1	seq-rs81354864	108.2186	84415417
1	seq-rs81354866	108.2234	84430724
1	seq-rs80873052	108.2589	84544270
1	seq-rs81474272	108.2801	84612275
1	seq-rs80933868	108.2891	84640944
1	seq-rs338981869	108.3265	84760744
1	seq-rs334561535	108.3361	84791377
1	seq-rs322986151	108.3969	84867978
1	seq-rs81320898	108.4631	84913463
1	seq-rs81256150	108.6056	85011343
1	seq-rs81474320	108.7424	85105315
1	seq-rs81330600	108.7737	85126821
1	seq-rs81310073	109.2229	85435369
1	seq-rs338702783	109.2982	85487093
1	seq-rs81321639	109.3632	85531739
1	seq-rs81354876	109.6107	85701697
1	seq-rs81286491	109.6419	85723130
1	seq-rs336837345	109.7581	85802955
1	seq-rs322168347	109.82	85845475
1	seq-rs80840327	109.837	85857175
1	seq-rs80864101	109.86	85872930
1	seq-rs333699990	109.8979	85898982
1	seq-rs710226710	109.9049	85903765
1	seq-rs80883711	110	86014836
1	seq-rs336597750	110.0553	86134596
1	seq-rs81354867	110.0695	86150696
1	seq-rs81354868	110.1377	86227622
1	seq-rs326644381	110.2539	86358711
1	seq-rs81336590	110.2549	86359770
1	seq-rs331482320	110.353	86470500
1	seq-rs338504838	110.3807	86501777
1	seq-rs319128799	110.3965	86519599
1	seq-rs318595911	110.4027	86526568
1	seq-rs344473451	110.4662	86598198
1	seq-rs81276284	110.5426	86684422
1	seq-rs81316626	110.5916	86739660
1	seq-rs333297974	110.7303	86896192
1	seq-rs80930168	110.7331	86899240
1	seq-rs80995769	110.8152	86991865
1	seq-rs80849858	110.8514	87032758
1	seq-rs80821258	110.887	87072923
1	seq-rs81474193	110.9274	87118522
1	seq-rs319124424	110.9852	87183745
1	seq-rs81240294	111.0742	87284139
1	seq-rs81474274	111.1142	87329182
1	seq-rs81354898	111.1876	87411985
1	seq-rs702260589	111.2281	87457726
1	seq-rs321829719	111.3257	87567852
1	seq-rs80853077	111.3421	87586276
1	seq-rs80921678	111.3991	87650663
1	seq-rs326693840	111.4529	87711284
1	seq-rs80981409	111.5342	87803047
1	seq-rs332468239	111.5361	87805217
1	seq-rs704905203	111.5564	87828116
1	seq-rs702416392	111.7089	88000123
1	seq-rs333247647	111.8363	88143859
1	seq-rs80784013	111.8665	88177932
1	seq-rs344968447	111.965	88289040
1	seq-rs81354911	112.0523	88372102
1	seq-rs81354908	112.139	88428444
1	seq-rs81354913	112.1748	88451759
1	seq-rs80841728	112.2366	88491930
1	seq-rs80854392	112.406	88602034
1	seq-rs318705055	112.5037	88665585
1	seq-rs337322157	112.5202	88676292
1	seq-rs80851153	112.5881	88720487
1	seq-rs699814377	112.6666	88771478
1	seq-rs81345080	112.8075	88863119
1	seq-rs343568490	113.1168	89156161
1	seq-rs332964490	113.1614	89202542
1	seq-rs328377568	113.1713	89212770
1	seq-rs338024505	113.2058	89248645
1	seq-rs338521898	113.2558	89300523
1	seq-rs80864876	113.3616	89410414
1	seq-rs80863204	113.4404	89492284
1	seq-rs80816749	113.45	89502293
1	seq-rs341655783	113.5706	89627520
1	seq-rs81354932	113.6597	89720010
1	seq-rs80914897	113.7172	89779792
1	seq-rs80961080	113.7572	89821352
1	seq-rs81243943	113.8292	89896098
1	seq-rs335774833	113.9025	89972222
1	seq-rs333701152	113.9482	90019686
1	seq-rs329624218	114.0117	90085632
1	seq-rs323098330	114.1365	90215296
1	seq-rs319510181	114.2763	90360417
1	seq-rs80842319	114.3434	90430193
1	seq-rs80848728	114.4153	90504830
1	seq-rs335719090	114.4373	90527696
1	seq-rs81354954	114.5314	90625399
1	seq-rs81354958	114.5598	90654890
1	seq-rs81354948	114.6222	90719685
1	seq-rs81354946	114.687	90787067
1	seq-rs80887454	114.7763	90879749
1	seq-rs80826498	114.8555	90962043
1	seq-rs81354961	114.8841	90991697
1	seq-rs81296972	114.9319	91041351
1	seq-rs80899296	115.014	91126608
1	seq-rs80873934	115.0898	91205357
1	seq-rs80930310	115.1603	91278566
1	seq-rs338198536	115.2092	91329382
1	seq-rs80991707	115.2367	91357929
1	seq-rs80863768	115.2874	91410570
1	seq-rs80831609	115.3275	91452269
1	seq-rs80908439	115.3637	91489854
1	seq-rs331131241	115.547	91665248
1	seq-rs345485118	115.5855	91700299
1	seq-rs80867850	115.6288	91739684
1	seq-rs80990821	115.6684	91775782
1	seq-rs80967371	115.7277	91829728
1	seq-rs80843908	115.8118	91906331
1	seq-rs80870562	115.9439	92026588
1	seq-rs80862334	116.0206	92096379
1	seq-rs324436739	116.0265	92101764
1	seq-rs80879008	116.1702	92293387
1	seq-rs333096718	116.1703	92293596
1	seq-rs80950648	116.1841	92347854
1	seq-rs333938762	116.2175	92478641
1	seq-rs45435107	116.2428	92577796
1	seq-rs45435108	116.2429	92577947
1	seq-rs342294238	116.2458	92589596
1	seq-rs334419866	116.2664	92670085
1	seq-rs342936809	116.3035	92815369
1	seq-rs328543641	116.3067	92828213
1	seq-rs80872282	116.32	92918387
1	seq-rs80873108	116.32	92967007
1	seq-rs80964181	116.32	93019315
1	seq-rs336010708	116.32	93156659
1	seq-rs335776855	116.32	93156881
1	seq-rs701519548	116.4244	93250978
1	seq-rs80918473	116.466	93267281
1	seq-rs335804101	116.4673	93267776
1	seq-rs80906167	116.6628	93363871
1	seq-rs80803057	116.6941	93402839
1	seq-rs80985509	116.7744	93502711
1	seq-rs698218720	116.8723	93624559
1	seq-rs710024005	116.9301	93696496
1	seq-rs700960162	116.9802	93758801
1	seq-rs709347556	117.0826	93886258
1	seq-rs329980096	117.2924	94147282
1	seq-rs80988475	117.3228	94185197
1	seq-rs80988214	117.3464	94214550
1	seq-rs80966483	117.3826	94259519
1	seq-rs80862379	117.4061	94288789
1	seq-rs343505135	117.4446	94336774
1	seq-rs80856627	117.4693	94367465
1	seq-rs322216231	117.5448	94461381
1	seq-rs342540453	117.6048	94536111
1	seq-rs80793899	117.6078	94539804
1	seq-rs322964480	117.6463	94587751
1	seq-rs80838792	117.7014	94656312
1	seq-rs80899241	117.7465	94712400
1	seq-rs323052910	117.7981	94776637
1	seq-rs323868878	117.9096	94915295
1	seq-rs338969934	117.9247	94934173
1	seq-rs80848256	117.9859	95010340
1	seq-rs326816886	118.0434	95081879
1	seq-rs325445644	118.0952	95146233
1	seq-rs697565191	118.186	95259314
1	seq-rs80983937	118.2919	95391090
1	seq-rs80855590	118.3131	95417462
1	seq-rs81355041	118.3615	95477646
1	seq-rs81355040	118.3862	95508344
1	seq-rs81229754	118.4442	95574421
1	seq-rs344100143	118.4802	95614294
1	seq-rs336981974	118.683	95838629
1	seq-rs332799525	118.7148	95873800
1	seq-rs80960611	118.7925	95974585
1	seq-rs80832911	118.8105	96015876
1	seq-rs323238071	118.8612	96132278
1	seq-rs323150950	118.9143	96254106
1	seq-rs81002770	118.9358	96303394
1	seq-rs80824434	118.9561	96350168
1	seq-rs80861011	118.9739	96390904
1	seq-rs342561663	118.9739	96390939
1	seq-rs80845645	118.993	96434739
1	seq-rs323202461	119.0142	96483343
1	seq-rs713198820	119.0448	96553553
1	seq-rs80970772	119.0626	96594378
1	seq-rs692808707	119.0708	96613251
1	seq-rs81341942	119.1266	96741269
1	seq-rs80887727	119.1689	96833336
1	seq-rs81259080	119.1888	96867639
1	seq-rs339158279	119.225	96929983
1	seq-rs80990998	119.2412	96957956
1	seq-rs322965048	119.2775	97020472
1	seq-rs80955605	119.32	97106656
1	seq-rs80886299	119.32	97189242
1	seq-rs80796136	119.3394	97268786
1	seq-rs344655027	119.4474	97479258
1	seq-rs329983357	119.451	97486325
1	seq-rs81355072	119.4725	97528192
1	seq-rs334726241	119.5764	97730716
1	seq-rs80820584	119.6304	97835870
1	seq-rs338606399	119.6817	97935857
1	seq-rs336282577	119.7386	98046663
1	seq-rs319503206	119.7394	98048248
1	seq-rs696029029	119.8806	98323316
1	seq-rs330266381	119.9526	98463609
1	seq-rs319991787	120.0461	98545123
1	seq-rs80822299	120.2076	98637932
1	seq-rs81355101	120.5489	98820531
1	seq-rs80976594	120.6045	98913197
1	seq-rs344444638	120.6599	99044030
1	seq-rs694159573	120.6786	99088414
1	seq-rs330021870	120.7417	99237583
1	seq-rs334943632	120.7987	99363719
1	seq-rs80806122	120.8344	99441810
1	seq-rs80910613	120.8487	99473102
1	seq-rs334106792	120.9013	99588254
1	seq-rs80911993	120.9365	99665215
1	seq-rs80803106	120.9584	99713078
1	seq-rs323783298	121.185	99794020
1	seq-rs332578226	121.6472	99952987
1	seq-rs80928328	121.6966	99976844
1	seq-rs80918845	121.7499	100050454
1	seq-rs80894887	121.8165	100142509
1	seq-rs80827717	121.8751	100223426
1	seq-rs80809617	121.9284	100297114
1	seq-rs80807910	122.002	100398783
1	seq-rs80991038	122.0176	100420304
1	seq-rs80829906	122.039	100449909
1	seq-rs80812787	122.0853	100513906
1	seq-rs331506646	122.1853	100652048
1	seq-rs709512418	122.2056	100680078
1	seq-rs322119929	122.2217	100702350
1	seq-rs81304928	122.2992	100809374
1	seq-rs339084030	122.3493	100878543
1	seq-rs81000235	122.3799	100920876
1	seq-rs80859234	122.4119	100965141
1	seq-rs330259729	122.4882	101070500
1	seq-rs80800029	122.5397	101141621
1	seq-rs80812145	122.5966	101220328
1	seq-rs319166477	122.63	101493266
1	seq-rs80829593	122.63	101582679
1	seq-rs332502770	122.6356	101646576
1	seq-rs80784602	122.6335	101771481
1	seq-rs80931370	122.6323	101787100
1	seq-rs80783098	122.6459	101836309
1	seq-rs80848752	122.6864	101884603
1	seq-rs80819357	122.7302	101936881
1	seq-rs345286458	122.7668	101977893
1	seq-rs81355231	122.8842	102071378
1	seq-rs326431437	123.2384	102250500
1	seq-rs320703347	123.4246	102324527
1	seq-rs81355256	123.7079	102437218
1	seq-rs81355250	123.8274	102484726
1	seq-rs325143819	123.8686	102501121
1	seq-rs341342565	123.8868	102508346
1	seq-rs331253380	124.0266	102605685
1	seq-rs80984309	124.0434	102718610
1	seq-rs338358771	124.0884	103021334
1	seq-rs693359481	124.0895	103028257
1	seq-rs80806413	124.0924	103047851
1	seq-rs344315418	124.1096	103163404
1	seq-rs80832402	124.1137	103191342
1	seq-rs80970887	124.1203	103235745
1	seq-rs321206257	124.1273	103282812
1	seq-rs318385441	124.1376	103351664
1	seq-rs339394023	124.1476	103418932
1	seq-rs330216753	124.1849	103669540
1	seq-rs334436763	124.1976	103755420
1	seq-rs341347849	124.2048	103803311
1	seq-rs81355278	124.207	103818293
1	seq-rs81355282	124.2179	103891575
1	seq-rs80836460	124.2252	103940473
1	seq-rs80904741	124.2311	103980217
1	seq-rs333089171	124.2345	104003379
1	seq-rs80904555	124.245	104073651
1	seq-rs80845900	124.255	104141210
1	seq-rs337305120	124.2735	104265561
1	seq-rs80882660	124.2776	104293294
1	seq-rs323968327	124.2791	104303349
1	seq-rs331371176	124.3293	104427544
1	seq-rs80981579	124.3706	104481440
1	seq-rs80909762	124.4091	104531602
1	seq-rs711261299	124.4769	104619959
1	seq-rs80930780	124.4923	104639988
1	seq-rs788955576	124.6208	104791824
1	seq-rs80976663	124.7804	104879973
1	seq-rs334529048	124.9286	104961848
1	seq-rs704813409	124.9336	104964602
1	seq-rs323768189	125.2376	105164764
1	seq-rs80865254	125.3027	105227791
1	seq-rs80913016	125.3305	105254701
1	seq-rs345987999	125.402	105323882
1	seq-rs81287678	125.4423	105362894
1	seq-rs81273279	125.4668	105386601
1	seq-rs81322857	126.0765	105726449
1	seq-rs81355326	126.0794	105732281
1	seq-rs335254199	126.1031	105780313
1	seq-rs81355324	126.1044	105783062
1	seq-rs81355335	126.1257	105826187
1	seq-rs80821486	126.1495	105874500
1	seq-rs81213057	126.175	105926290
1	seq-rs10719839	126.1872	105951016
1	seq-rs319597692	126.1894	105955486
1	seq-rs81355341	126.2323	106042541
1	seq-rs335176885	126.2805	106140487
1	seq-rs344251343	126.3163	106212961
1	seq-rs81227706	126.3611	106297666
1	seq-rs81306584	126.4041	106360939
1	seq-rs326744975	126.4286	106396879
1	seq-rs342680273	126.454	106434099
1	seq-rs81323508	126.5156	106524646
1	seq-rs80829406	126.6634	106741589
1	seq-rs80973421	126.73	106839739
1	seq-rs322530880	126.73	106861335
1	seq-rs324834956	126.73	106943074
1	seq-rs709528612	126.73	106986729
1	seq-rs319403617	126.73	106997154
1	seq-rs80890797	126.73	107075251
1	seq-rs80874676	126.7326	107096392
1	seq-rs80813546	126.7552	107170715
1	seq-rs80911183	126.8088	107226518
1	seq-rs80841909	126.8635	107283424
1	seq-rs80904460	126.9213	107343474
1	seq-rs80970692	127.0387	107465596
1	seq-rs80849877	127.0613	107489096
1	seq-rs80824913	127.1157	107545649
1	seq-rs327042357	127.1645	107596440
1	seq-rs334008522	127.2298	107664371
1	seq-rs332382990	127.3242	107762585
1	seq-rs81474759	127.3625	107802348
1	seq-rs80810704	127.4976	107942856
1	seq-rs81001361	127.5841	108032798
1	seq-rs80889848	127.7394	108194359
1	seq-rs80869292	127.7598	108215566
1	seq-rs80882164	127.8175	108275560
1	seq-rs318686759	127.9431	108406184
1	seq-rs335632769	128.1171	108587190
1	seq-rs327997798	128.1784	108650947
1	seq-rs81259759	128.2143	108688323
1	seq-rs81355409	128.2739	108750283
1	seq-rs328678145	128.3205	108798780
1	seq-rs696877620	128.4469	108930185
1	seq-rs705399080	128.4535	108937110
1	seq-rs81355420	128.5277	109014259
1	seq-rs81355452	128.5495	109036931
1	seq-rs81355431	128.6097	109082834
1	seq-rs80936023	128.841	109245786
1	seq-rs80948913	128.8907	109280791
1	seq-rs80914432	129.0145	109367973
1	seq-rs80842193	129.0733	109409360
1	seq-rs332222098	129.2227	109514658
1	seq-rs341040810	129.2928	109564008
1	seq-rs329617425	129.3399	109597196
1	seq-rs337186244	129.3515	109605338
1	seq-rs323002433	129.4687	109687905
1	seq-rs342479437	129.6053	109784140
1	seq-rs80942561	129.6201	109794535
1	seq-rs324295428	129.7343	109874960
1	seq-rs788697305	129.7743	109903168
1	seq-rs81297000	129.7882	109912929
1	seq-rs321798537	130.0415	110091367
1	seq-rs341997956	130.0798	110118325
1	seq-rs331852692	130.2266	110221705
1	seq-rs81355469	130.3091	110279854
1	seq-rs343342640	130.3574	110313837
1	seq-rs341298826	130.4842	110403172
1	seq-rs325572068	130.589	110476990
1	seq-rs327087023	130.6901	110548193
1	seq-rs344377473	130.8558	110664918
1	seq-rs80828168	130.9	110705112
1	seq-rs81260757	130.9938	110903682
1	seq-rs332195243	131.202	110959041
1	seq-rs332157352	131.2392	110968922
1	seq-rs334310020	131.3809	111006587
1	seq-rs344902797	131.5133	111041776
1	seq-rs694562307	131.9651	111150236
1	seq-rs343326727	132.11	111304862
1	seq-rs331115743	132.11	111325358
1	seq-rs342816005	132.11	111406448
1	seq-rs80998825	132.1621	111552970
1	seq-rs699837841	132.188	111621932
1	seq-rs336472858	132.2039	111664283
1	seq-rs80902427	132.2318	111738387
1	seq-rs80945882	132.2751	111853799
1	seq-rs81342966	132.307	111938688
1	seq-rs81328214	132.3877	112021930
1	seq-rs81224015	132.4002	112026700
1	seq-rs691121622	132.6145	112108624
1	seq-rs80998524	132.9741	112246100
1	seq-rs80973213	133.1428	112299849
1	seq-rs80802721	133.2721	112334349
1	seq-rs321930954	133.3967	112386694
1	seq-rs324108485	133.457	112445828
1	seq-rs335147576	133.4576	112446422
1	seq-rs325886277	133.576	112562555
1	seq-rs324859861	133.5789	112565331
1	seq-rs343019106	133.7135	112697386
1	seq-rs80932099	133.743	112726301
1	seq-rs80895319	133.7918	112774157
1	seq-rs338616842	133.8931	112873465
1	seq-rs330227208	133.99	112981301
1	seq-rs319136589	134.0367	113033305
1	seq-rs326202270	134.209	113061808
1	seq-rs330834685	134.5847	113123965
1	seq-rs80803043	134.6289	113131271
1	seq-rs80819138	134.879	113172644
1	seq-rs318319749	134.8857	113173762
1	seq-rs80913418	135.0379	113198936
1	seq-rs340430851	135.2454	113233263
1	seq-rs80898773	135.38	113358109
1	seq-rs80960560	135.38	113450938
1	seq-rs80992308	135.38	113473890
1	seq-rs80954079	135.38	113524314
1	seq-rs322112009	135.38	113643823
1	seq-rs80820644	135.38	113733119
1	seq-rs81231758	135.38	113776291
1	seq-rs343775590	135.38	113835353
1	seq-rs81322902	135.38	113839947
1	seq-rs80883529	135.38	113930519
1	seq-rs335687029	135.38	113962786
1	seq-rs80783601	135.38	114015245
1	seq-rs320337371	135.38	114075856
1	seq-rs343633727	135.38	114116616
1	seq-rs80869295	135.38	114138633
1	seq-rs343976819	135.38	114362930
1	seq-rs80844653	135.38	114543720
1	seq-rs81355496	135.38	114582738
1	seq-rs345374106	135.38	114685878
1	seq-rs336404798	135.4287	114734079
1	seq-rs80893996	135.4711	114750456
1	seq-rs324232873	135.5771	114793927
1	seq-rs80900783	135.7496	114867162
1	seq-rs326984066	135.9184	114938769
1	seq-rs80833063	136.1024	115016840
1	seq-rs331334761	136.2577	115082759
1	seq-rs346354576	136.4709	115173267
1	seq-rs325687465	136.56	115226236
1	seq-rs80827731	136.56	115259642
1	seq-rs324520747	136.56	115322119
1	seq-rs80907502	136.56	115336324
1	seq-rs80862006	136.56	115378453
1	seq-rs80904533	136.56	115476563
1	seq-rs329726672	136.56	115562530
1	seq-rs333459729	136.56	115610920
1	seq-rs333078743	136.56	115689373
1	seq-rs81355500	136.56	115707215
1	seq-rs81355502	136.56	115817229
1	seq-rs81296979	136.56	115838612
1	seq-rs341325997	136.56	115874263
1	seq-rs320107023	136.56	115886467
1	seq-rs328512443	136.56	115934288
1	seq-rs330299606	136.6866	116029254
1	seq-rs80879387	137.048	116120580
1	seq-rs320630931	137.3672	116201247
1	seq-rs321651939	137.5467	116372385
1	seq-rs346377164	137.5644	116389484
1	seq-rs699949548	137.7062	116526178
1	seq-rs339641713	137.7886	116605666
1	seq-rs81355504	137.9731	116745584
1	seq-rs331574923	138.2343	116890739
1	seq-rs80825522	138.6984	117148730
1	seq-rs321031460	138.9309	117284820
1	seq-rs81355510	138.9449	117301395
1	seq-rs80929711	138.9592	117318447
1	seq-rs80862247	138.9941	117359842
1	seq-rs81216057	139.1156	117504062
1	seq-rs81355525	139.1479	117542416
1	seq-rs81355515	139.3241	117616089
1	seq-rs343467770	139.4901	117676113
1	seq-rs324323762	139.6	117818008
1	seq-rs81355534	139.6049	117846961
1	seq-rs319439897	139.6768	117924334
1	seq-rs80931254	139.7863	118042320
1	seq-rs80808933	139.8327	118092274
1	seq-rs331881982	139.9	118320524
1	seq-rs346013795	139.9	118368034
1	seq-rs322985995	139.9	118370336
1	seq-rs329489051	139.9	118483714
1	seq-rs700415269	139.9	118511135
1	seq-rs340499861	139.9	118609148
1	seq-rs336207206	139.9	118612696
1	seq-rs335472826	139.9	118700632
1	seq-rs344405751	139.9	118738914
1	seq-rs80942668	139.9697	118845627
1	seq-rs80916394	140.0174	118901594
1	seq-rs80788886	140.1048	119004005
1	seq-rs80809527	140.1099	119009938
1	seq-rs80926449	140.1434	119049298
1	seq-rs338241973	140.2045	119120907
1	seq-rs691808973	140.2559	119181115
1	seq-rs346238106	140.2811	119210621
1	seq-rs342172180	140.4133	119365664
1	seq-rs81355558	140.4891	119454475
1	seq-rs80998094	140.5254	119497046
1	seq-rs80893317	140.5255	119497071
1	seq-rs80957499	140.5766	119556999
1	seq-rs338947752	140.5778	119558464
1	seq-rs326702149	140.6171	119604509
1	seq-rs45432063	140.6789	119676880
1	seq-rs327405623	140.6991	119751166
1	seq-rs341477884	140.7314	119874835
1	seq-rs55618714	140.7637	119998531
1	seq-rs324953814	140.783	120072500
1	seq-rs334354583	140.7928	120109897
1	seq-rs341728516	140.7988	120132852
1	seq-rs80986375	140.7996	120136077
1	seq-rs325985275	141.0209	120290210
1	seq-rs328966147	141.0226	120330202
1	seq-rs80835889	141.0263	120417008
1	seq-rs80943037	141.0285	120469527
1	seq-rs325624990	141.0291	120484622
1	seq-rs326129676	141.033	120574821
1	seq-rs321669888	141.0332	120580759
1	seq-rs335393321	141.0357	120638977
1	seq-rs339577119	141.039	120716034
1	seq-rs789845667	141.0426	120801490
1	seq-rs81289836	141.0432	120816036
1	seq-rs81249144	141.0465	120894943
1	seq-rs340193921	141.0544	121080723
1	seq-rs328784300	141.0564	121128221
1	seq-rs320194684	141.0564	121128357
1	seq-rs321205760	141.0574	121150954
1	seq-rs81355582	141.0661	121356509
1	seq-rs342834284	141.0673	121384630
1	seq-rs328782596	141.0686	121414950
1	seq-rs342005003	141.0697	121441133
1	seq-rs322028928	141.076	121590862
1	seq-rs80967297	141.0775	121626075
1	seq-rs80794948	141.0791	121663779
1	seq-rs337941110	141.0799	121682530
1	seq-rs81235993	141.0823	121739704
1	seq-rs80943238	141.0841	121782234
1	seq-rs80890036	141.0852	121809053
1	seq-rs321241565	141.0868	121846834
1	seq-rs332191462	141.0869	121847050
1	seq-rs344257766	141.0869	121847376
1	seq-rs81355598	141.0924	121978687
1	seq-rs80912134	141.0933	121999146
1	seq-rs693174605	141.096	122062108
1	seq-rs337289912	141.097	122086341
1	seq-rs80975238	141.1042	122256137
1	seq-rs80971100	141.1057	122292053
1	seq-rs344574101	141.1069	122319569
1	seq-rs80954479	141.111	122416847
1	seq-rs80919536	141.1132	122470014
1	seq-rs320393182	141.1142	122492755
1	seq-rs80820778	141.1199	122628688
1	seq-rs345008362	141.1208	122649208
1	seq-rs80963227	141.1231	122703947
1	seq-rs320722201	141.1262	122776350
1	seq-rs80922777	141.1278	122814672
1	seq-rs80925652	141.1291	122843794
1	seq-rs345168666	141.1304	122875736
1	seq-rs327903000	141.1324	122922311
1	seq-rs345921594	141.1405	123114218
1	seq-rs333681174	141.145	123220315
1	seq-rs80898455	141.1476	123280822
1	seq-rs318918338	141.1499	123334501
1	seq-rs80982157	141.151	123361676
1	seq-rs80889760	141.1533	123415670
1	seq-rs81002187	141.1544	123441355
1	seq-rs80918939	141.1556	123469826
1	seq-rs327674992	141.1608	123593103
1	seq-rs329863449	141.1647	123684416
1	seq-rs342738615	141.1716	123847694
1	seq-rs342656953	141.173	123881360
1	seq-rs319087556	141.1756	123943540
1	seq-rs80831840	141.1786	124014542
1	seq-rs81268817	141.1913	124312290
1	seq-rs337173130	141.1918	124324805
1	seq-rs81336209	141.1949	124397175
1	seq-rs81224182	141.195	124400764
1	seq-rs318628227	141.1988	124490858
1	seq-rs81000741	141.1998	124513677
1	seq-rs327425306	141.203	124589112
1	seq-rs331240215	141.2052	124642443
1	seq-rs325297647	141.2073	124690377
1	seq-rs336875505	141.2103	124761776
1	seq-rs327658563	141.2115	124791131
1	seq-rs345482528	141.2134	124834446
1	seq-rs81355678	141.2149	124871157
1	seq-rs81355682	141.216	124896300
1	seq-rs80834119	141.2295	125216064
1	seq-rs80937376	141.2316	125264297
1	seq-rs327239570	141.2377	125408085
1	seq-rs81280412	141.2384	125424741
1	seq-rs81355697	141.2439	125555348
1	seq-rs337434424	141.2473	125635037
1	seq-rs81355702	141.2478	125648304
1	seq-rs81355717	141.2507	125714885
1	seq-rs338763810	141.2536	125785267
1	seq-rs80837798	141.259	125912707
1	seq-rs335973049	141.2593	125919356
1	seq-rs321677906	141.2641	126032843
1	seq-rs326389472	141.2696	126162795
1	seq-rs344940050	141.2713	126201773
1	seq-rs318369711	141.2742	126270308
1	seq-rs321850187	141.2754	126299588
1	seq-rs326858765	141.2768	126332860
1	seq-rs80856892	141.2804	126417273
1	seq-rs343521960	141.2872	126577957
1	seq-rs81249478	141.289	126619587
1	seq-rs332365004	141.2896	126635215
1	seq-rs80950791	141.2938	126733293
1	seq-rs80937545	141.2947	126753882
1	seq-rs80849099	141.2961	126787874
1	seq-rs81355723	141.3024	126935800
1	seq-rs345699227	141.308	127067506
1	seq-rs329250751	141.3085	127079669
1	seq-rs80998778	141.3124	127172643
1	seq-rs336786360	141.3146	127224219
1	seq-rs346130946	141.3155	127246338
1	seq-rs80997567	141.3236	127437757
1	seq-rs344719060	141.3277	127533740
1	seq-rs330105990	141.3319	127633477
1	seq-rs342164998	141.334	127681780
1	seq-rs325892811	141.3362	127734930
1	seq-rs328931665	141.3417	127863863
1	seq-rs342824972	141.35	128060455
1	seq-rs326506935	141.354	128154069
1	seq-rs329016276	141.3542	128158903
1	seq-rs339968741	141.357	128225652
1	seq-rs80817195	141.3602	128301842
1	seq-rs321041129	141.3645	128401759
1	seq-rs331958194	141.3649	128411676
1	seq-rs327741260	141.3685	128495751
1	seq-rs81255510	141.3707	128547750
1	seq-rs81355741	141.3707	128548435
1	seq-rs80868608	141.3743	128634670
1	seq-rs345861278	141.3787	128737817
1	seq-rs80852014	141.3817	128807833
1	seq-rs318548067	141.3833	128847130
1	seq-rs790125947	141.3881	128958741
1	seq-rs80826044	141.3956	129136194
1	seq-rs80852825	141.3977	129185459
1	seq-rs80961441	141.4012	129268324
1	seq-rs323708740	141.4051	129361693
1	seq-rs80912295	141.4062	129386945
1	seq-rs80798010	141.4079	129427641
1	seq-rs336207112	141.417	129641878
1	seq-rs326537141	141.4214	129745948
1	seq-rs81348088	141.4216	129750754
1	seq-rs80803028	141.4347	130060199
1	seq-rs80860857	141.4373	130121507
1	seq-rs80794877	141.4391	130163429
1	seq-rs342131842	141.4406	130198499
1	seq-rs333043168	141.4427	130247767
1	seq-rs329910097	141.4449	130300420
1	seq-rs80816756	141.4455	130315172
1	seq-rs80961292	141.4466	130340853
1	seq-rs80804520	141.4509	130442873
1	seq-rs345660424	141.4535	130504664
1	seq-rs344152100	141.458	130609762
1	seq-rs80844792	141.4622	130709887
1	seq-rs336492548	141.4644	130761152
1	seq-rs343245137	141.4741	130989655
1	seq-rs319455844	141.4744	130997782
1	seq-rs80974812	141.475	131011448
1	seq-rs323353802	141.4766	131049150
1	seq-rs328144017	141.4812	131157264
1	seq-rs330402650	141.4866	131285083
1	seq-rs698848227	141.4898	131360062
1	seq-rs335656324	141.4965	131519684
1	seq-rs81348124	141.4984	131564328
1	seq-rs333018440	141.4993	131584438
1	seq-rs323520198	141.5021	131651494
1	seq-rs81348134	141.5057	131735322
1	seq-rs332146133	141.5074	131776721
1	seq-rs321981732	141.5143	131938193
1	seq-rs344841858	141.5188	132046319
1	seq-rs80832469	141.5195	132062497
1	seq-rs80995153	141.5326	132371467
1	seq-rs344493484	141.535	132428740
1	seq-rs345944196	141.5381	132500784
1	seq-rs81348151	141.5383	132505233
1	seq-rs80902896	141.541	132568746
1	seq-rs80983506	141.5421	132595455
1	seq-rs80981405	141.5447	132657598
1	seq-rs80809004	141.5499	132779670
1	seq-rs80995108	141.5519	132826911
1	seq-rs80919452	141.5592	132999230
1	seq-rs80824018	141.5669	133180774
1	seq-rs80840166	141.5702	133258994
1	seq-rs80837359	141.5731	133326538
1	seq-rs80846032	141.5843	133591232
1	seq-rs712927272	141.5948	133839875
1	seq-rs692957419	141.5973	133899086
1	seq-rs710916300	141.6004	133972774
1	seq-rs323404246	141.6066	134118611
1	seq-rs81348206	141.6075	134139838
1	seq-rs81348216	141.6127	134261673
1	seq-rs345248091	141.6127	134261883
1	seq-rs80984469	141.6147	134309184
1	seq-rs333482038	141.6226	134496421
1	seq-rs322309228	141.6246	134544600
1	seq-rs338422646	141.6297	134662987
1	seq-rs329747691	141.6312	134698595
1	seq-rs341201592	141.6348	134785448
1	seq-rs326826086	141.6363	134820812
1	seq-rs705437616	141.6433	134985717
1	seq-rs326757477	141.6521	135192560
1	seq-rs327356124	141.6551	135263927
1	seq-rs81238640	141.6575	135320152
1	seq-rs81255478	141.6598	135375075
1	seq-rs339726434	141.6617	135420569
1	seq-rs329230112	141.6649	135495440
1	seq-rs319733244	141.6927	136152278
1	seq-rs80961082	141.6948	136200644
1	seq-rs322571114	141.6965	136240599
1	seq-rs80901144	141.698	136275937
1	seq-rs80849330	141.6999	136322384
1	seq-rs336684201	141.7032	136399742
1	seq-rs80911912	141.7044	136427159
1	seq-rs342975596	141.7152	136681916
1	seq-rs337042682	141.7156	136692742
1	seq-rs80786009	141.7163	136708788
1	seq-rs325818423	141.7216	136834346
1	seq-rs80850045	141.724	136891518
1	seq-rs319929476	141.7299	137029951
1	seq-rs80952848	141.7301	137035325
1	seq-rs344518622	141.7345	137137382
1	seq-rs80813238	141.7361	137175214
1	seq-rs80973234	141.7375	137210400
1	seq-rs337637409	141.7406	137282403
1	seq-rs81316422	141.7454	137394981
1	seq-rs80965593	141.7455	137398114
1	seq-rs81216481	141.749	137481014
1	seq-rs337535780	141.7503	137512402
1	seq-rs321145181	141.754	137597913
1	seq-rs340314393	141.7576	137683845
1	seq-rs80989502	141.7595	137728350
1	seq-rs80936421	141.7612	137767785
1	seq-rs80978678	141.7621	137791048
1	seq-rs80908186	141.7652	137861999
1	seq-rs80815022	141.7677	137923234
1	seq-rs80925616	141.7709	137998037
1	seq-rs80920475	141.7731	138050612
1	seq-rs80925601	141.774	138070556
1	seq-rs323419103	141.7771	138144933
1	seq-rs80812701	141.7819	138257957
1	seq-rs80987503	141.7845	138318407
1	seq-rs81280714	141.7866	138369258
1	seq-rs81348362	141.7882	138406703
1	seq-rs81348366	141.7903	138456206
1	seq-rs81348385	141.8001	138686941
1	seq-rs336606264	141.8013	138715962
1	seq-rs337801153	141.8023	138738904
1	seq-rs81348386	141.8103	138927010
1	seq-rs336794826	141.8158	139057057
1	seq-rs337911087	141.8225	139216602
1	seq-rs320985027	141.8245	139263398
1	seq-rs326387353	141.826	139298243
1	seq-rs336948736	141.8348	139506450
1	seq-rs80925675	141.8388	139600667
1	seq-rs80793368	141.8416	139666897
1	seq-rs80921820	141.8443	139730255
1	seq-rs80884172	141.8467	139786881
1	seq-rs80839460	141.8483	139825864
1	seq-rs336150235	141.8495	139854817
1	seq-rs81239456	141.8556	139996752
1	seq-rs334381704	141.8644	140204477
1	seq-rs81283807	141.8667	140260943
1	seq-rs342947035	141.8702	140343341
1	seq-rs325818250	141.8744	140441152
1	seq-rs80797269	141.8749	140452547
1	seq-rs80880269	141.8766	140492801
1	seq-rs340235479	141.8792	140555380
1	seq-rs80838510	141.8842	140673154
1	seq-rs80854458	141.8864	140725359
1	seq-rs333162336	141.8901	140812628
1	seq-rs80869432	141.8914	140842490
1	seq-rs329281472	141.8954	140938131
1	seq-rs332029775	141.896	140952037
1	seq-rs329501306	141.9021	141094800
1	seq-rs80884009	141.9065	141200008
1	seq-rs80953257	141.9088	141252903
1	seq-rs343891751	141.92	141518443
[truncated: 33,304 more rows]
